# Supplementary material for: The human IL-17A/F heterodimer: a two-faced cytokine with unique receptor recognition properties
Source: PubMed Central journal article supplement (PMC5566378; doi:10.1038/s41598-017-08360-9), 2017-08-21
Supplement: 41598_2017_8360_MOESM1_ESM.pdf [file 41598_2017_8360_MOESM1_ESM.pdf]

1 **The human IL-17A/F heterodimer: a two-faced**  
2 **cytokine with unique receptor recognition**  
3 **properties**

4

5 Arnaud Goepfert, Sylvie Lehmann, Emmanuelle Wirth & Jean-Michel Rondeau

6 Novartis Institutes for BioMedical Research, Novartis Pharma AG, CH-4002 Basel, Switzerland

7

8

9

10

11

12

13

14

15

16

17

18

19

20

21

22

23

24

25

26

27 **Supplementary information**

28

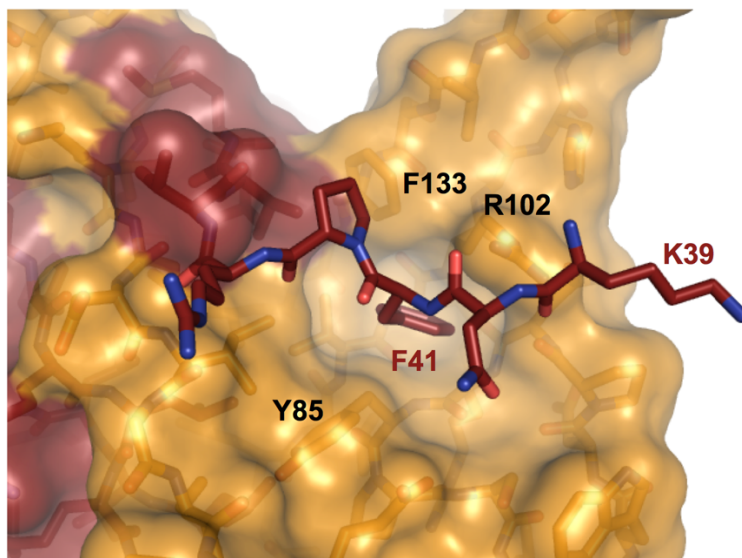

29

30 **Supplementary Figure 1** Blockade of Site 1F of free IL-17A/F by Phe41 from the A-subunit. Close-up view  
31 showing a surface representation of the free IL-17A/F heterodimer. The F- and A-subunits are in orange and  
32 carmine, respectively. The N-terminal residues Lys39 to Arg43 of the A-subunit are shown in stick  
33 representation and not included in the surface representation of the cytokine for clarity. Note the binding of  
34 the side-chain of Phe41 into a pocket lined by Tyr85, Phe133 and Arg102 from the F-subunit. This pocket  
35 corresponds to the binding site for Trp62 of IL-17RA.

36

37

38

39

40

41

42

43

44

45

46

47

48

49

50

51

52

| IL-17      | Chain     | Site 1                                                                          |                           | Site 2                                                                                              |                                                                              | Site 3                                                                               |                                                                 |
|------------|-----------|---------------------------------------------------------------------------------|---------------------------|-----------------------------------------------------------------------------------------------------|------------------------------------------------------------------------------|--------------------------------------------------------------------------------------|-----------------------------------------------------------------|
| <b>A</b>   | <b>A</b>  | L49, I51, E80, E83, Y85, L122, <b>R124</b> , F133                               |                           | N55, <b>S63</b> , <b>D65</b> , Y67, <b>R78</b> , V88, I89, P86, W90                                 |                                                                              | K61, S64, Y66, <b>R69</b>                                                            |                                                                 |
|            | <b>A'</b> | R43, L135                                                                       |                           | Q116, <b>Q117</b> , <b>E118</b> , K137, L139                                                        |                                                                              | L97, Y108, <b>H109</b> , <b>N111</b> , V113, V147, P149, I150, V151, H153, V154      |                                                                 |
| <b>F</b>   | <b>F</b>  | I59, I61, W88, P90, N91, <b>Y93</b> , S95, V130, R132, <b>H134</b> , V139, F141 |                           | Q66, <b>R67</b> , S71, <b>N73</b> , <b>E75</b> , Y84, V86, P94, E96, V97, V98, V148                 |                                                                              | M70, <b>R77</b> , <b>R72</b>                                                         |                                                                 |
|            | <b>F'</b> | S54, M55                                                                        |                           | Q124, <b>Q125</b> , <b>E126</b> , K145, L147                                                        |                                                                              | L105, I116, S117, <b>N119</b> , S120, V121, V155, P157, V158, I159, H160, H161, V162 |                                                                 |
| <b>A/F</b> |           | <b>Site 1A</b>                                                                  | <b>Site 1F</b>            | <b>Site 2A</b>                                                                                      | <b>Site 2F</b>                                                               | <b>Site 3A</b>                                                                       | <b>Site 3F</b>                                                  |
|            | <b>A</b>  | L49, I51, E80, E83, Y85, L122, R124, F133                                       | V45                       | N55, S63, D65, Y67, R78, V88, I89, P86, W90                                                         | Q117, E118, K137, L139                                                       | K61, S64, Y66, R69                                                                   | L97, Y108, H109, N111, V113, V147, P149, V151, H152, H153, V154 |
| <b>F</b>   | G53       | I59, I61, W88, P90, N91, <b>Y93</b> , S95, V130, R132, <b>H134</b> , V139, F141 | Q94, Q95, E96, K115, L117 | Q66, <b>R67</b> , S71, <b>N73</b> , <b>E75</b> , <b>Y84</b> , V86, P94, <b>E96</b> , V97, V98, V148 | L105, I116, S117, N119, S120, V121, V155, P157, V158, I159, H160, H161, V162 | M70, I74, <b>R72</b> , <b>R77</b>                                                    |                                                                 |

53 **Supplementary Table 1** Conserved binding sites in IL-17A, IL17F and IL-17A/F. Residues lining the IL-  
54 17RA binding sites 1-3 in IL-17A (4hsa.pdb), IL-17F (3jvf.pdb) and IL-17A/F (this work) are listed. While  
55 the two sides of the homodimeric cytokines are identical by symmetry, the "A-face" differs from the "F-face"  
56 in the heterodimeric IL-17A/F, hence Sites 1-3 are sub-divided into Sites 1A-3A and Sites 1F-3F. Residues  
57 lining Sites 1F-3F were directly identified from the crystal structure of the IL-17A/F complex with IL-17RA.  
58 Residues lining the "A-face" were listed based on the assumption that the binding of IL-17RA to the "A-face"  
59 of IL-17A/F is similar to its binding to IL-17A. Residues in bold case are engaged in H-bonded interactions  
60 with IL-17RA, while underlined residues form salt-bridges with the receptor.

61

62

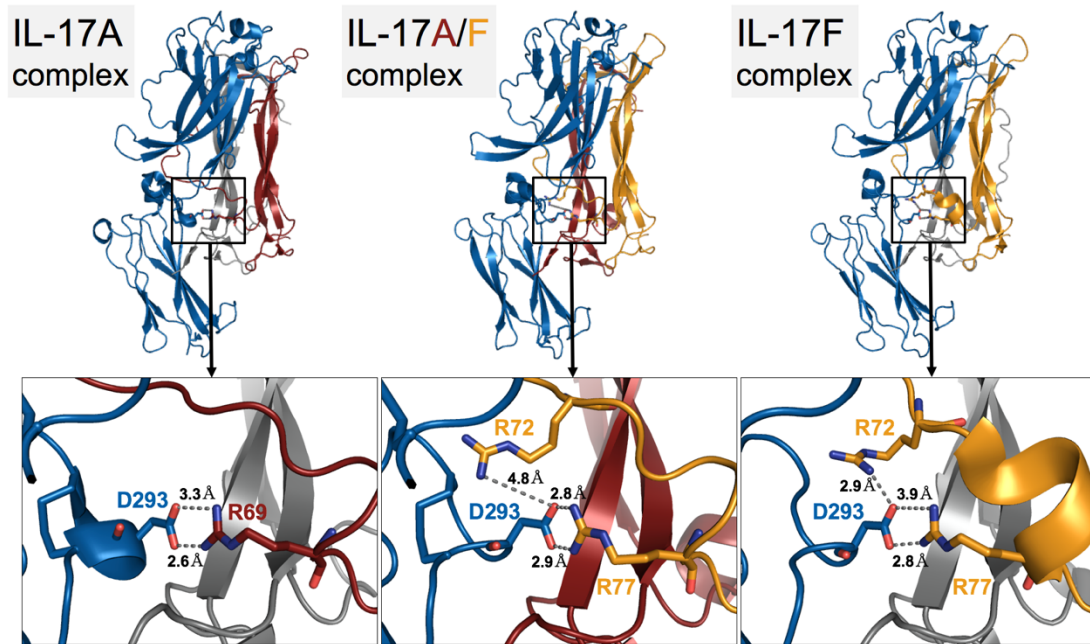

63

64

65 **Supplementary Figure 2** Key salt-bridge interaction between IL-17RA (blue ribbon) and IL-17A (left view;  
 66 the two IL-17A subunits are shown as a carmine and gray ribbon, respectively; figure based on 4hsa.pdb),  
 67 IL-17A/F (center; carmine ribbon: A- subunit; orange ribbon: F-subunit; this work), and IL-17F (right view;  
 68 the two IL-17F subunits are shown as an orange and gray ribbon, respectively; based on 3jvf.pdb). The top  
 69 panel shows an overall view of the complex, the lower panel a close-up view of the salt-bridge interaction  
 70 with the side-chains involved depicted in stick representation.

71

72

73

74

75

76

77

78

79

80

81

82

83

84

85

86

| Cytokine | Variant             | IL-17RA<br>K <sub>d</sub> (nM) | IL-17RC<br>K <sub>d</sub> (nM) |
|----------|---------------------|--------------------------------|--------------------------------|
| IL-17A   | wt                  | 0.7                            | 0.4                            |
|          | R69A                | 297                            | 1500                           |
| IL-17F   | wt                  | 136                            | 4                              |
|          | R77A                | 726                            | 905                            |
| IL-17A/F | wt                  | 17.5                           | 0.6                            |
|          | A(R69A)             | 42                             | 15                             |
|          | F(R77A)             | 30                             | 5                              |
|          | A(R69A),<br>F(R77A) | 202                            | 1100                           |

87 **Supplementary Table 2** Summary of equilibrium dissociation constants obtained from SPR analysis of  
88 wild-type and variant IL-17A, IL-17F and IL-17A/F binding to the IL-17 receptors IL-17RA or IL-17RC (see  
89 also Fig. 5). The K<sub>d</sub> values shown are the mean from at least five independent experiments.

90

91

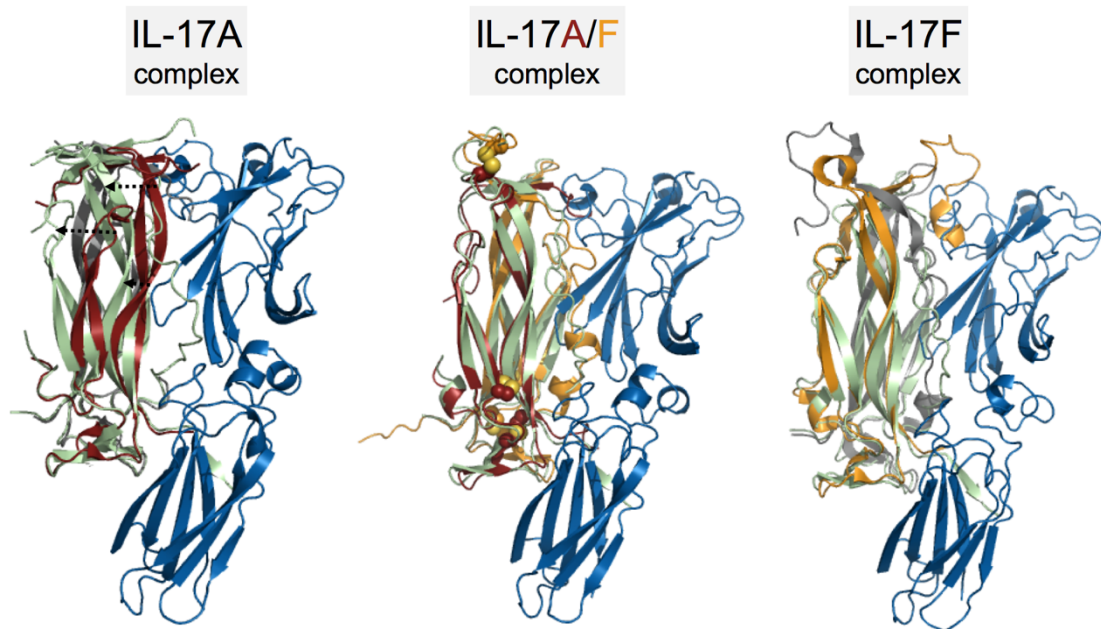

92

93 **Supplementary Figure 3** IL-17RA (blue ribbon) induced allosteric changes in IL-17A (left view, figure  
94 based on 4hr9.pdb and 4hsa.pdb), IL-17A/F (center, this work) and IL-17F (right view; based on 1jpy.pdb  
95 and 3jvf.pdb). The receptor-bound cytokines are depicted as a green ribbon, while the free cytokines are  
96 shown in carmine/grey (IL-17A), carmine/orange (IL-17A/F A- and F-chain, respectively) and orange/grey  
97 (IL-17F). Structure-based alignments were computed with Lsqman<sup>46</sup> using a maximum matching distances  
98 of 1.2Å. Note the large allosteric changes observed with IL-17A, indicated by dotted arrows.

| Maximum matching distance |                   | IL-17A | IL-17A/F | IL-17F |
|---------------------------|-------------------|--------|----------|--------|
| 3.50Å                     | rms deviation (Å) | 1.52   | 1.08     | 1.14   |
|                           | matched residues  | 132    | 192      | 192    |
| 1.2Å                      | rms deviation (Å) | 0.56   | 0.72     | 0.69   |
|                           | matched residues  | 81     | 141      | 133    |

100 **Supplementary Table 3** Least square superpositions of the free- and IL-17RA-bound forms of IL-17A, IL-  
 101 17A/F and IL-17F, calculated with Lsqman<sup>46</sup>.

102

103

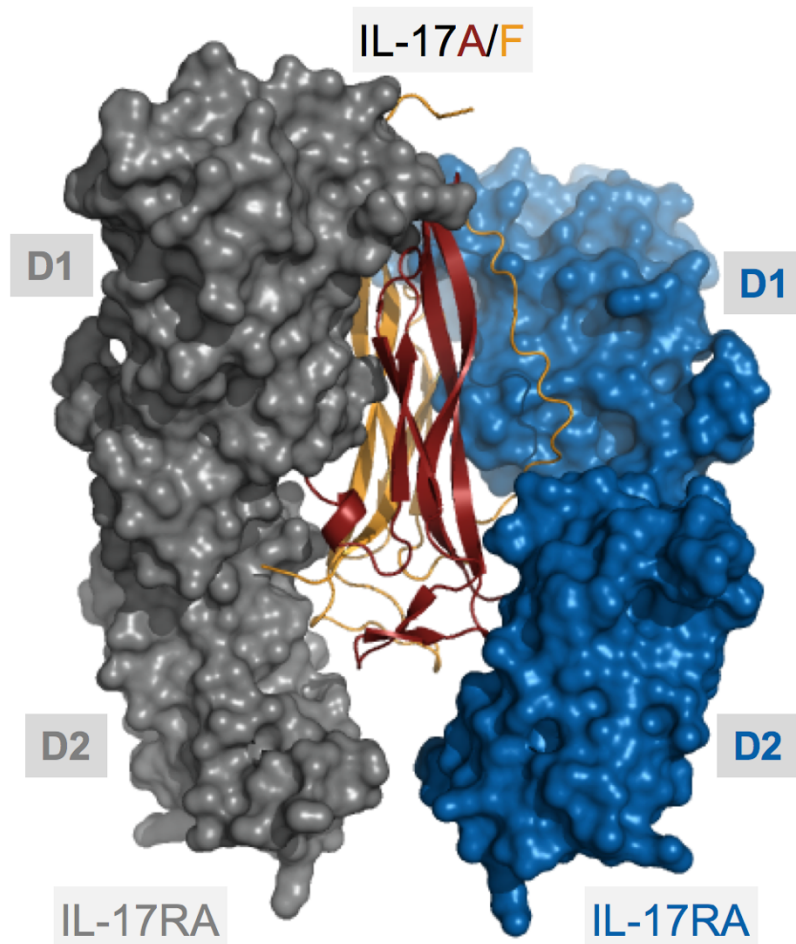

104

105 **Supplementary Figure 4** Structural model of IL-17A/F (A-chain:carmine/F-chain:orange ribbon) bound to  
 106 two copies of the IL-17RA ECD (blue and grey surface representations). The blue IL-17RA is based on the  
 107 crystal structure of the IL-17A/F complex with IL-17RA bound to the “F-face” of the cytokine. The grey IL-  
 108 17RA model was placed by applying the transformation that brings the F-chain onto the A-chain of the  
 109 heterodimer to the blue IL-17RA model. Note that there is no steric clash between the two receptor chains.

110

| <b>Model</b>                            | <b>Resolution<br/>limit (Å)</b> | <b>R<sub>work</sub></b> | <b>R<sub>free</sub></b> | <b>R<sub>free</sub>-R<sub>work</sub></b> |
|-----------------------------------------|---------------------------------|-------------------------|-------------------------|------------------------------------------|
| <b>Model refined against 3.30Å data</b> | 3.30                            | 0.1856                  | 0.2431                  | 0.0575                                   |
|                                         | 3.57                            | 0.1851                  | 0.2426                  | 0.0575                                   |
|                                         | 3.62                            | 0.1839                  | 0.2411                  | 0.0572                                   |
| <b>Model refined against 3.57Å data</b> | 3.57                            | 0.1951                  | 0.2547                  | 0.0596                                   |
| <b>Model refined against 3.62Å data</b> | 3.62                            | 0.1922                  | 0.2532                  | 0.0610                                   |

112 **Supplementary Table 4** Paired refinement tests showing that the model refined against 3.30Å data fits the  
113 diffraction data to 3.57Å or 3.62Å resolution better (lower R<sub>free</sub>) than the corresponding models refined  
114 against 3.57Å or 3.62Å resolution data.
